# Supplementary material for: Application of Oocyte Cryopreservation Technology in TALEN-Mediated Mouse Genome Editing
Source: PubMed Central journal article supplement — Exp Anim. 2014 Aug 22;63(3):349–55. doi: 10.1538/expanim.63.349 (PMC4206739; doi:10.1538/expanim.63.349), 2014-08-22
Supplement: expanim-63-349-s002.pdf [file expanim-63-349-s002.pdf]

**Supplementary Table 1** Summary of the results of freeze-thawing in Ayu 8104 mice

| Group           | Females | Fertility       | Frozen | Recovered   | Normal      |
|-----------------|---------|-----------------|--------|-------------|-------------|
| MU<br>(control) | 15      | 152/397 (38.3%) | -      | -           | -           |
| MF              | -       | -               | 80     | 78 (97.5%)  | 68 (87.2%)  |
| IUF             | 9       | 242/305 (79.3%) | 242    | 222 (91.7%) | 135 (60.8%) |
| IFF             | 8       | 135/190 (71.1%) | 135    | 119 (88.1%) | 84 (70.6%)  |

## Supplementary Table 2 Summary of the analyses for *bL* mutant screening

|                   |       |       |       |       |       |       |       |        |       |       |      |
|-------------------|-------|-------|-------|-------|-------|-------|-------|--------|-------|-------|------|
| Founders          | MU1   | MU2   | MU3   | MU4   | MU5   | MU6   | MU7   | MU8    | MU9   | MU10  |      |
| HMA               | ND    | +     | ND    | ND*   | ND    | ND    | ND    | +*     | +     | ND    |      |
| RFLP              | +     | +     | +     | NT    | ND    | +     | +     | NT     | NT    | ND    |      |
| Sequence mutation | +     | +     | +     | +     | NT    | +     | +     | +      | +     | NT    |      |
| Genotype          | MT    | MT    | MT    | MT    |       | MT    | MT    | MT     | MT    |       |      |
| Founders          | MF1   | MF2   | MF3   | MF4   | MF5   | MF6   | MF7   | MF8    | MF9   | MF10  |      |
| HMA               | ND    | ND*   | ND    | ND    | ND    | ND*   | ND    | ND*    | ND*   | ND    |      |
| RFLP              | ND    | NT    | ND    | ND    | ND    | NT    | ND    | NT     | NT    | ND    |      |
| Sequence mutation | NT    | +     | NT    | NT    | NT    | +     | NT    | +      | +     | NT    |      |
| Genotype          |       | MT    |       |       |       | MT    |       | MT     | MT    |       |      |
| Founders          | MF11  | MF12  | MF13  | MF14  | MF15  | MF16  | MF17  | MF18   | MF19  | MF20  | MF21 |
| HMA               | ND    | ND    | ND    | ND    | ND    | ND    | ND*   | ND     | ND    | ND    | ND   |
| RFLP              | ND    | +     | ND    | ND    | ND    | +     | NT    | ND     | ND    | ND    | ND   |
| Sequence mutation | NT    | +     | NT    | NT    | NT    | +     | +     | +/-*** | NT    | NT    | NT   |
| Genotype          |       | MT    |       |       |       | MT    | MT    |        |       |       |      |
| Founders          | IUF1  | IUF2  | IUF3  | IUF4  | IUF5  | IUF6  | IUF7  | IUF8   | IUF9  | IUF10 |      |
| HMA               | ND    | +     | ND    | +     | ND    | ND    | ND    | ND*    | +     | ND    |      |
| RFLP              | ND    | +     | +     | NT    | ND    | +     | ND    | NT     | NT    | ND    |      |
| Sequence mutation | NT    | +     | +     | +     | NT    | +     | NT    | +      | +     | NT    |      |
| Genotype          |       | MT    | MT    | MT    |       | MT    |       | MT     | MT    |       |      |
| Founders          | IUF11 | IUF12 | IUF13 | IUF14 | IUF15 | IUF16 | IUF17 | IUF18  | IUF19 | IUF20 |      |
| HMA               | +     | ND    | ND    | ND    | ND    | ND*   | ND    | ND     | ND*   | +     |      |
| RFLP              | NT    | ND    | ND    | ND    | ND    | NT    | ND    | ND     | NT    | NT    |      |
| Sequence mutation | +     | NT    | NT    | NT    | NT    | +     | NT    | NT     | +     | +     |      |
| Genotype          | MT    |       |       |       |       | MT    |       |        | MT    | MT    |      |
| Founders          | IFF1  | IFF2  | IFF3  | IFF4  | IFF5  | IFF6  |       |        |       |       |      |
| HMA               | ND    | ND    | ND    | +     | ND    | ND**  |       |        |       |       |      |
| RFLP              | ND    | ND    | ND    | NT    | ND    | NT    |       |        |       |       |      |
| Sequence mutation | ND    | ND    | NT    | +     | NT    | +     |       |        |       |       |      |
| Genotype          |       |       |       | MT    |       | MT    |       |        |       |       |      |

\* Smaller amplicon appeared.

\*\* Larger amplicon appeared.

\*\*\* Only single-base substitution was detected.

HMA, heteroduplex mobility assay. RFLP, restriction fragment length polymorphism. ND, not detected. NT, not tested. MT, mutant.

**Supplementary Table 3** Summary of the results of freeze-thawing in C57BL/6N mice

| Group | Females | Fertility       | Frozen | Recovered   | Normal      |
|-------|---------|-----------------|--------|-------------|-------------|
| MUM   | 20      | 204/494 (41.3%) | -      | -           | -           |
| MUI   | 19      | 274/577 (47.5%) | -      | -           | -           |
| MFM   | -       | -               | 81     | 81 (100.0%) | 81 (100.0%) |
| MFI   | -       | -               | 150    | 139 (92.7%) | 113 (81.3%) |

## Supplementary Table 4 Summary of the analyses for *Clec4b1* mutant screening

|                   |       |       |       |       |       |       |       |       |       |       |       |       |
|-------------------|-------|-------|-------|-------|-------|-------|-------|-------|-------|-------|-------|-------|
| Founders          | MUM1  | MUM2  | MUM3  | MUM4  | MUM5  | MUM6  | MUM7  | MUM8  | MUM9  | MUM10 |       |       |
| HMA               | ND*   | ND    | +     | ND*   | ND*   | ND    | ND*   | ND    | ND*   | ND    |       |       |
| RFLP              | NT    | +     | NT    | NT    | NT    | +     | NT    | ND    | NT    | +     |       |       |
| Sequence mutation | +     | +     | +     | +     | +     | +     | +     | NT    | +     | +     |       |       |
| Genotype          | MT    |       | MT    | MT    |       |       |
| Founders          | MUM11 | MUM12 | MUM13 | MUM14 | MUM15 | MUM16 | MUM17 | MUM18 | MUM19 | MUM20 |       |       |
| HMA               | ND    | +     | ND    | +     | ND*   | +     | +     | +     | ND*   | ND    |       |       |
| RFLP              | +     | NT    | +     | NT    | NT    | NT    | NT    | NT    | NT    | +     |       |       |
| Sequence mutation | +     | +     | +     | +     | +     | +     | +     | +     | +     | +     |       |       |
| Genotype          | MT    |       |       |
| Founders          | MUI1  | MUI2  | MUI3  | MUI4  | MUI5  | MUI6  | MUI7  | MUI8  | MUI9  | MUI10 |       |       |
| HMA               | ND    | +     | ND    | ND*   | ND    | +     | ND    | +     | +     | +     |       |       |
| RFLP              | ND    | NT    | +     | NT    | +     | NT    | +     | NT    | NT    | NT    |       |       |
| Sequence mutation | NT    | +     | +     | +     | +     | +     | +     | +     | +     | +     |       |       |
| Genotype          |       | MT    |       |       |
| Founders          | MUI11 | MUI12 | MUI13 | MUI14 | MUI15 | MUI16 | MUI17 | MUI18 | MUI19 | MUI20 |       |       |
| HMA               | ND    | +     | +     | +     | ND    | ND    | ND    | +     | +     | ND    |       |       |
| RFLP              | +     | NT    | NT    | NT    | +     | +     | +     | NT    | NT    | +     |       |       |
| Sequence mutation | +     | +     | +     | +     | +     | +     | +     | +     | +     | +     |       |       |
| Genotype          | MT    |       |       |
| Founders          | MFM1  | MFM2  | MFM3  | MFM4  | MFM5  | MFM6  |       |       |       |       |       |       |
| HMA               | ND    | +     | ND    | ND*   | ND*   | ND    |       |       |       |       |       |       |
| RFLP              | +     | NT    | +     | NT    | +     | +     |       |       |       |       |       |       |
| Sequence mutation | +     | +     | +     | +     | +     | +     |       |       |       |       |       |       |
| Genotype          | MT    | MT    | MT    | MT    | MT    | MT    |       |       |       |       |       |       |
| Founders          | MFI1  | MFI2  | MFI3  | MFI4  | MFI5  | MFI6  | MFI7  | MFI8  | MFI9  | MFI10 | MFI11 | MFI12 |
| HMA               | ND    | ND*   | +     | ND    | +     | ND    | ND    | ND    | +     | +     | ND    | +     |
| RFLP              | +     | NT    | NT    | +     | NT    | +     | +     | +     | NT    | NT    | +     | NT    |
| Sequence mutation | +     | +     | +     | +     | +     | +     | +     | +     | +     | +     | +     | +     |
| Genotype          | MT    |

\* Smaller amplicon appeared.

HMA, heteroduplex mobility assay. RFLP, restriction fragment length polymorphism. ND, not detected. NT, not tested. MT, mutant.
